# Supplementary material
Source: MDPI journal article supplement (https://www.mdpi.com/1424-8247/17/3/374)
Supplement: s1 [file s1]

Figure S1. Original unprocessed immunoblots for all all proteins of interest

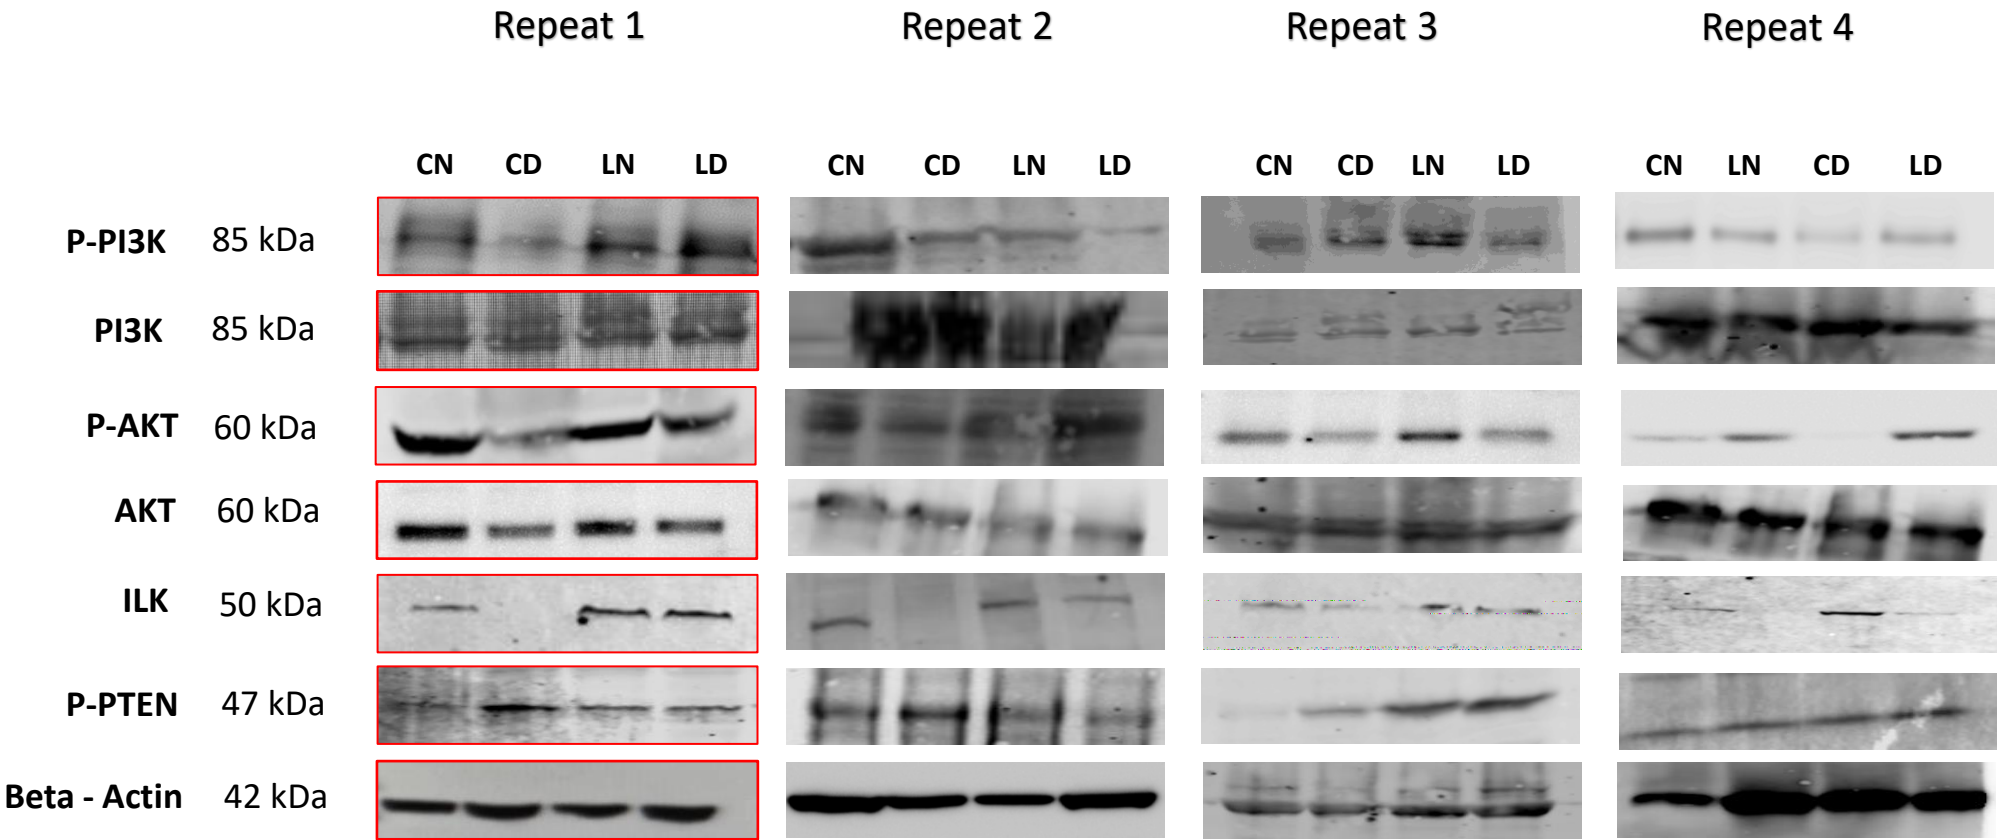

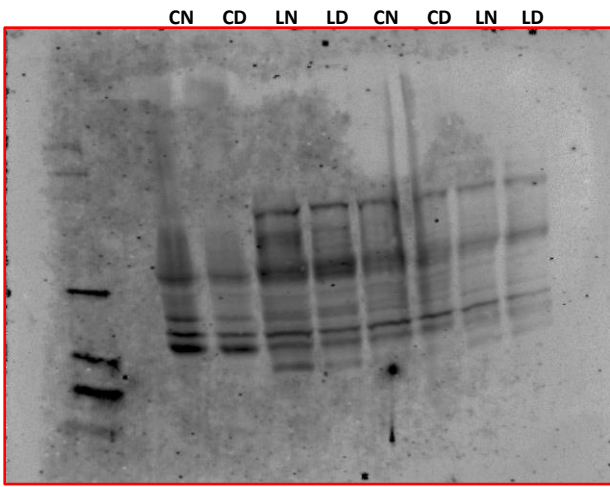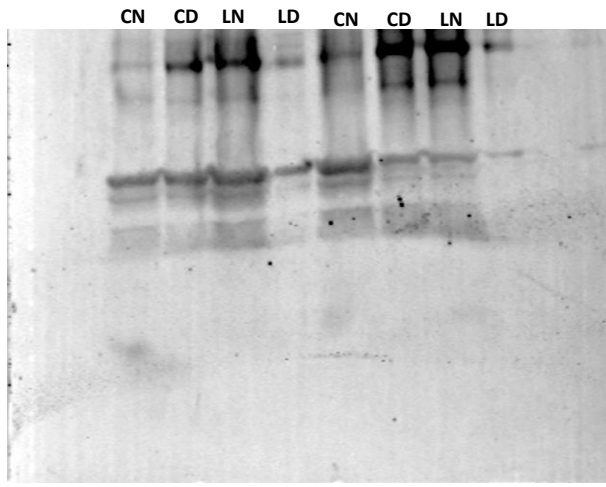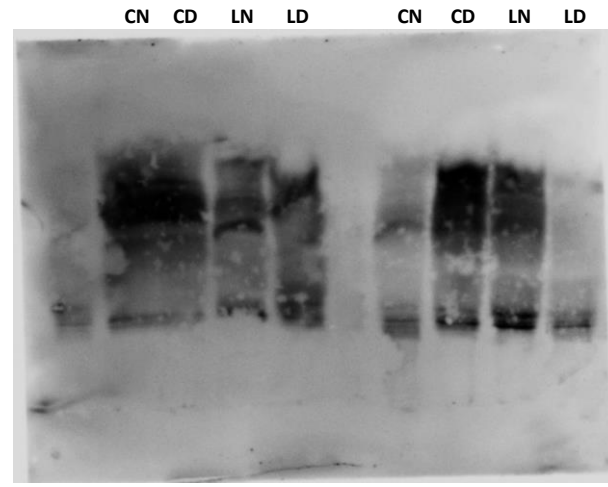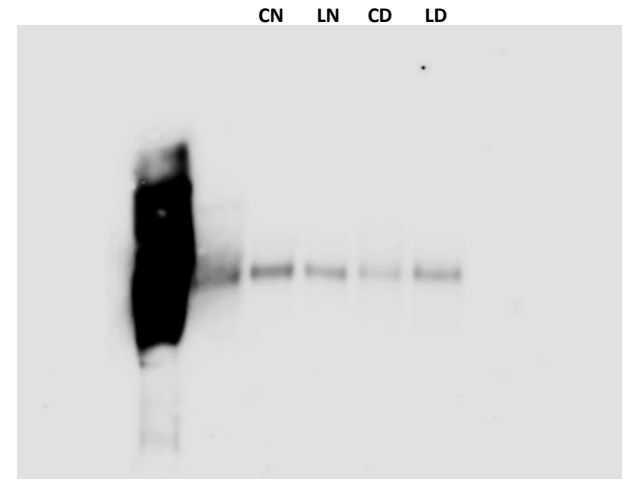

P-PI3K

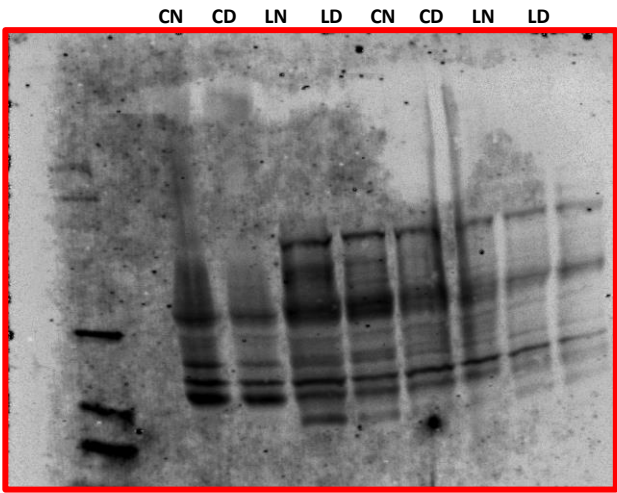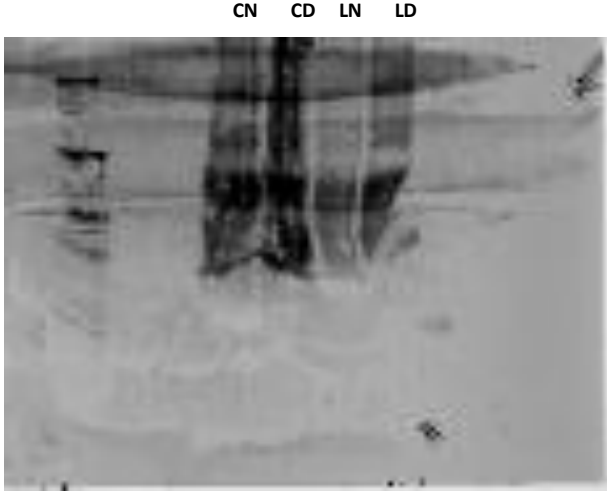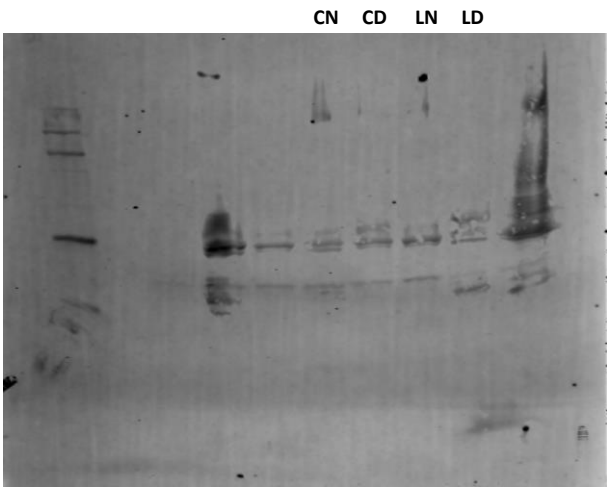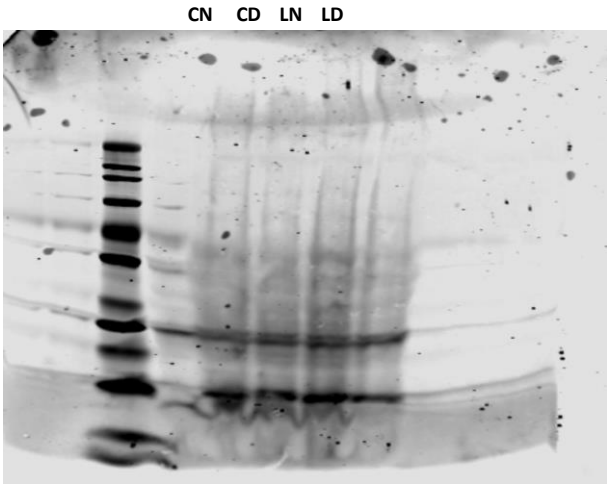

PI3K

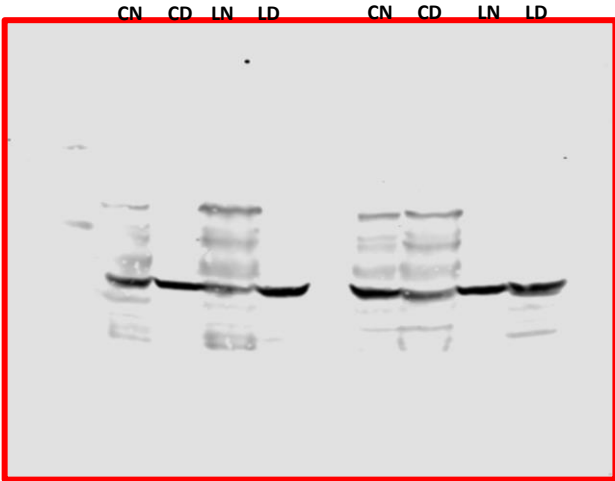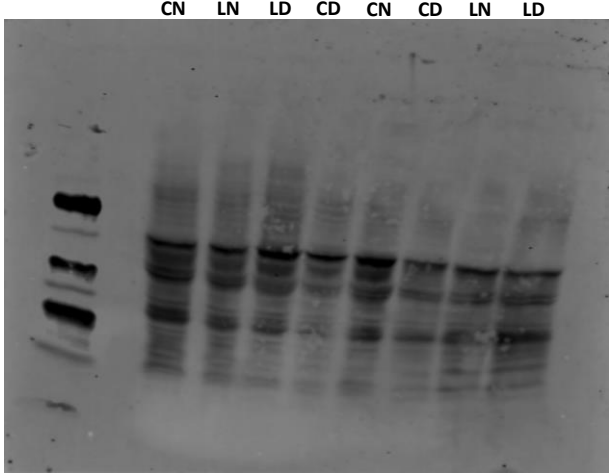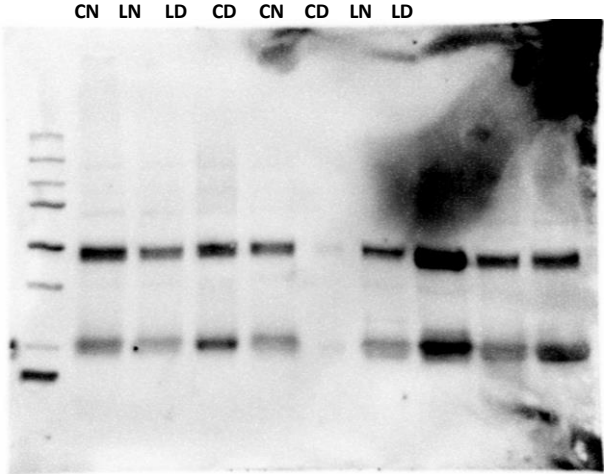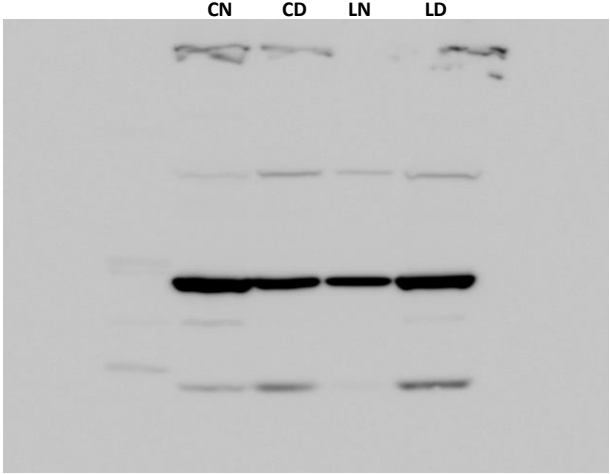

P-AKT

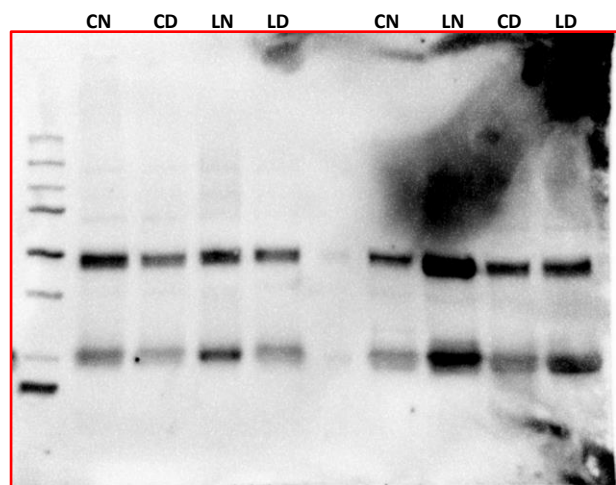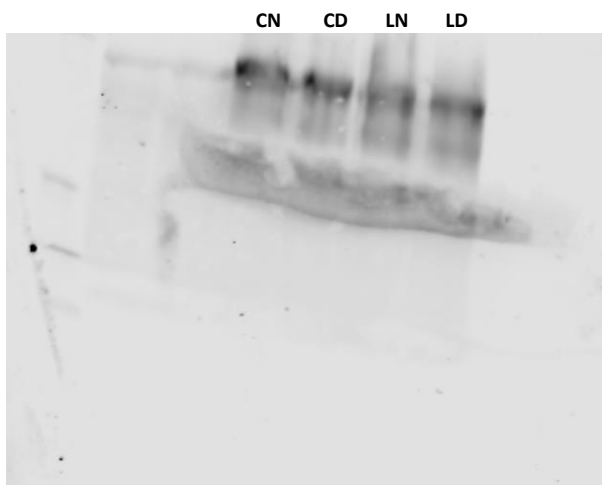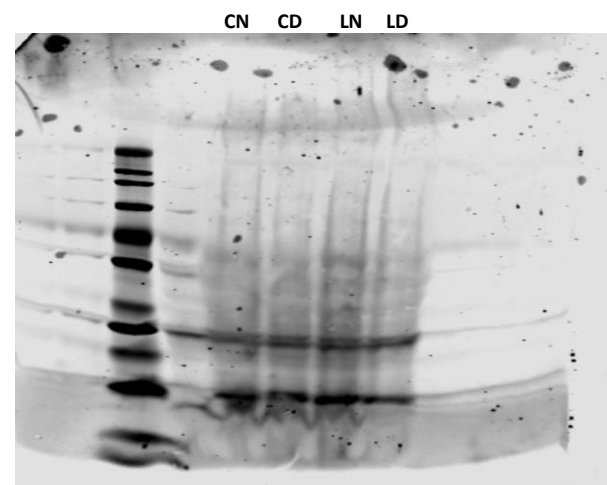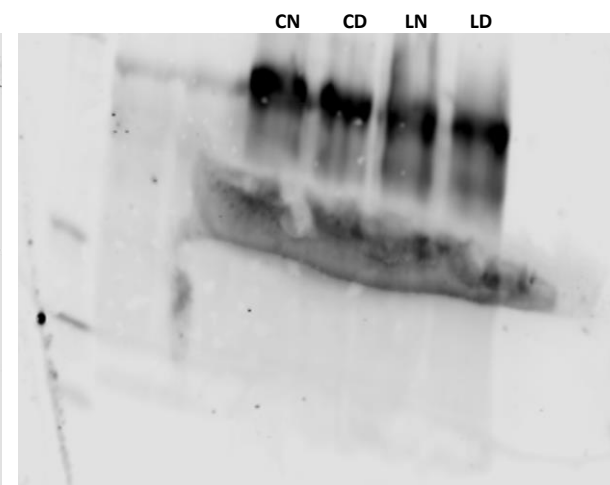

AKT

CN CD LN LD

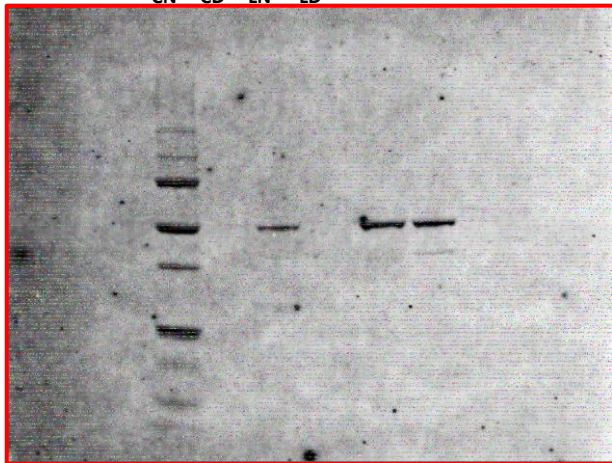

CN CD LN LD

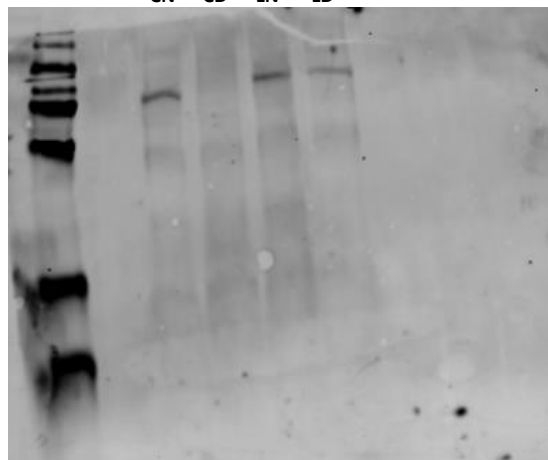

CN CD LN LD

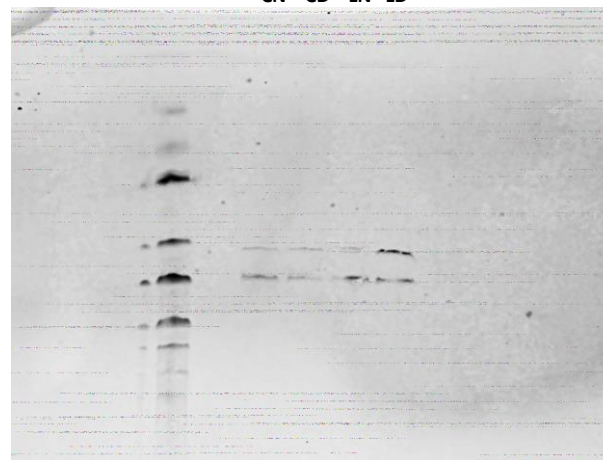

CN CD LN LD

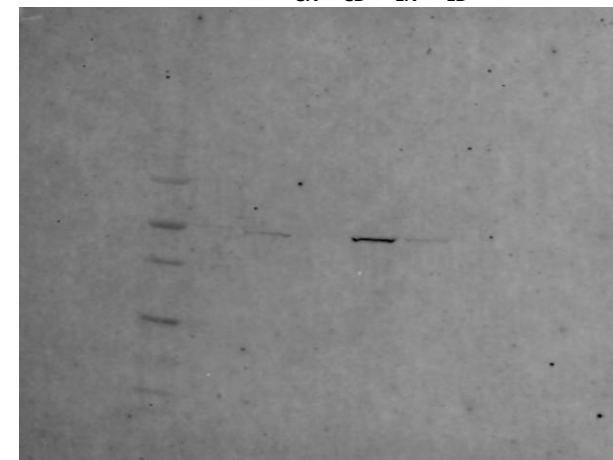

ILK



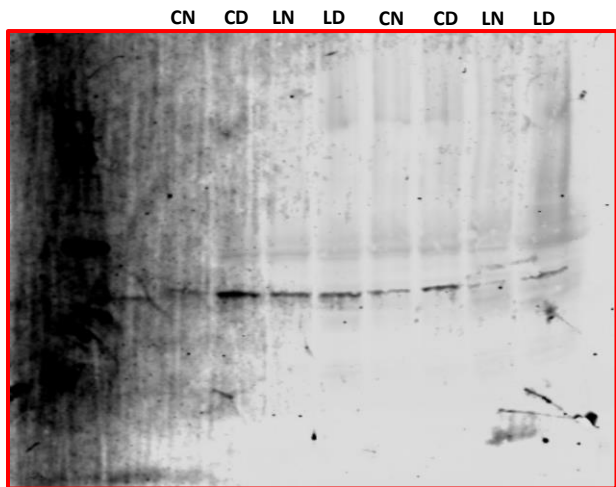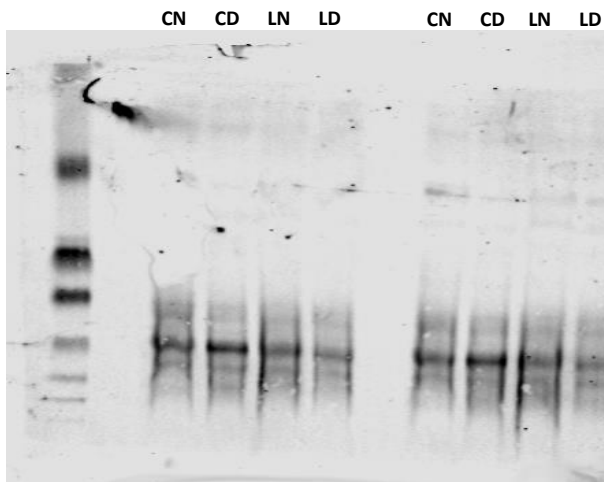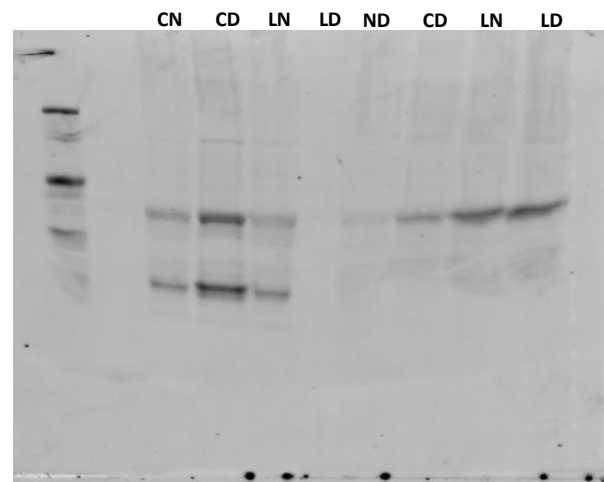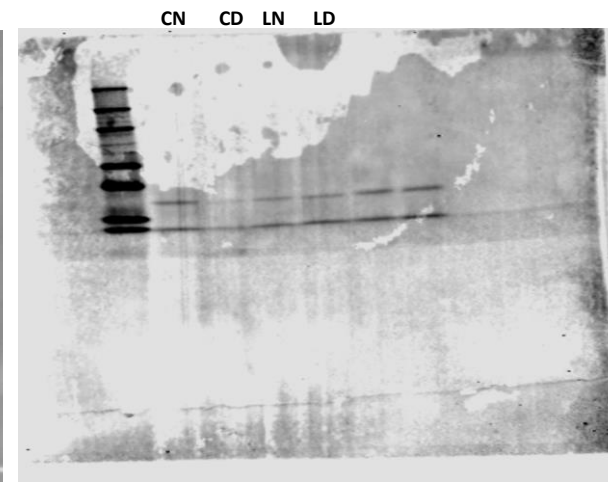

P-PTEN

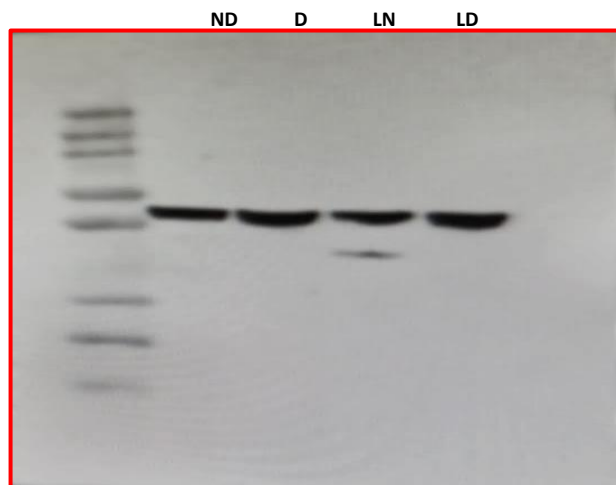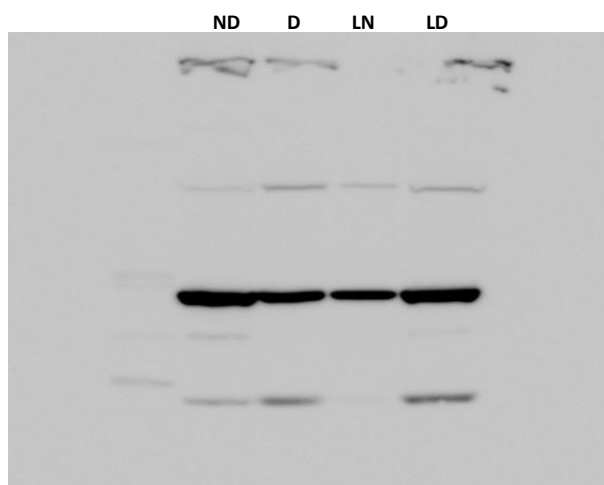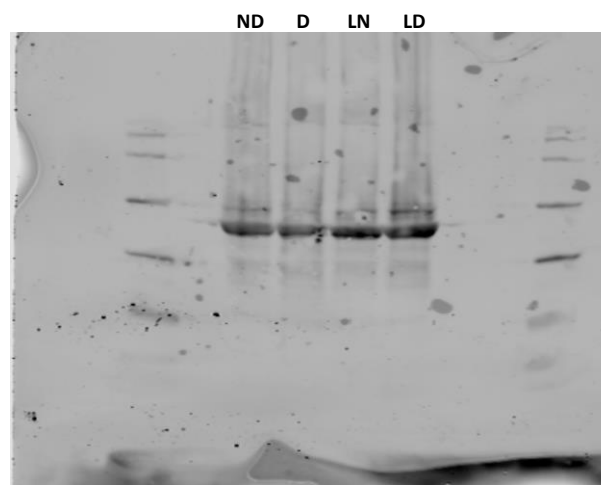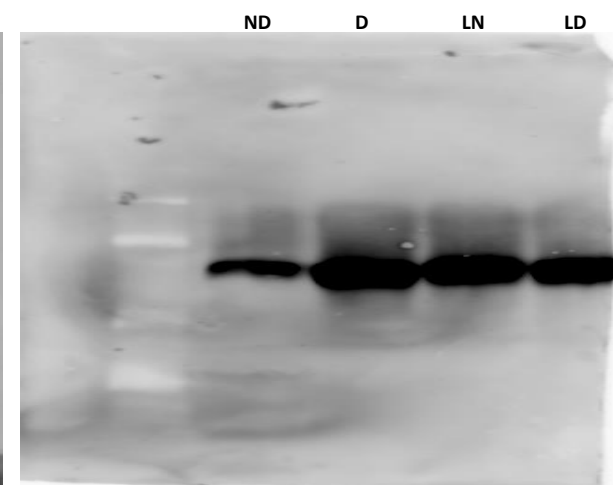

$\beta$ -Actin
