# Supplementary material
Source: MDPI journal article supplement (https://www.mdpi.com/1424-8247/17/3/374)
Supplement: s1 [file s1]

**Table S1 (A).** Original data for the effects of liraglutide on body weight (g) in diabetic rats.

|              | Non-diabetic control | Diabetic control | Liraglutide-treated non-diabetic rats | Liraglutide-treated diabetic rats |
|--------------|----------------------|------------------|---------------------------------------|-----------------------------------|
| Repeat no. 1 | 365                  | 245              | 307                                   | 275                               |
| Repeat no. 2 | 352                  | 292              | 377                                   | 322                               |
| Repeat no. 3 | 397                  | 257              | 352                                   | 334                               |
| Repeat no. 4 | 366                  | 240              | 354                                   | 361                               |
| Repeat no. 5 | 472                  | 200              | 325                                   | 339                               |
| Repeat no. 6 | 383                  | 278              | 330                                   | 289                               |

**Table S1 (B).** Original data for the effects of liraglutide on heart weight/body weight ratio (mg/g) in diabetic rats.

|              | Non-diabetic control | Diabetic control | Liraglutide-treated non-diabetic rats | Liraglutide-treated diabetic rats |
|--------------|----------------------|------------------|---------------------------------------|-----------------------------------|
| Repeat no. 1 | 3.20547945           | 5.30612245       | 2.50814332                            | 2.90909091                        |
| Repeat no. 2 | 3.23863636           | 3.97260274       | 3.02387268                            | 2.73291925                        |
| Repeat no. 3 | 1.76322418           | 3.19066148       | 2.5000000                             | 2.2754491                         |
| Repeat no. 4 | 1.83060109           | 4.08333333       | 2.96610169                            | 2.90858726                        |
| Repeat no. 5 | 2.75423729           | 6.45000000       | 2.76923077                            | 2.74336283                        |
| Repeat no. 6 | 2.92428198           | 5.50359712       | 2.87878788                            | 3.21799308                        |

**Table S1 (C).** Original data for the effects of liraglutide on glucose levels (mg/dl) in diabetic rats.

|              | Non-diabetic control | Diabetic control | Liraglutide-treated non-diabetic rats | Liraglutide-treated diabetic rats |
|--------------|----------------------|------------------|---------------------------------------|-----------------------------------|
| Repeat no. 1 | 20.6395349           | 119.767442       | 86.0465116                            | 62.6453488                        |
| Repeat no. 2 | 65.6976744           | 120.784884       | 82.2674419                            | 64.8255814                        |
| Repeat no. 3 | 32.4127907           | 114.97093        | 47.8197674                            | 46.5116279                        |
| Repeat no. 4 | 32.994186            | 124.273256       | 62.7906977                            | 67.005814                         |
| Repeat no. 5 | 39.9709302           | 103.488372       | 60.755814                             | 74.5639535                        |
| Repeat no. 6 | 44.4767442           | 75.5813953       | 67.2965116                            | 58.7209302                        |

**Table S1 (D).** Original data for the effects of liraglutide on serum cardiac biomarkers (Troponin-I (pg/mL)) in diabetic rats.

|              | Non-diabetic control | Diabetic control | Liraglutide-treated non-diabetic rats | Liraglutide-treated diabetic rats |
|--------------|----------------------|------------------|---------------------------------------|-----------------------------------|
| Repeat no. 1 | 132.94894630658      | 261.268043036461 | 158.81684083682                       | 198.864810441775                  |
| Repeat no. 2 | 139.996013919469     | 342.298418318752 | 158.81684083682                       | 177.207968509482                  |
| Repeat no. 3 | 125.472179449003     | 223.787366633701 | 155.207367181438                      | 196.028795426832                  |
| Repeat no. 4 | 98.315187184698      | 242.436313853176 | 132.94894630658                       | 177.981427149921                  |
| Repeat no. 5 | 122.808044131935     | 284.289020285822 | 116.190675763734                      | 159.676239326197                  |
| Repeat no. 6 | 116.792254706298     | 224.732704972015 | 120.745487757431                      | 113.956239691355                  |

**Table S1 (E).** Original data for the effects of liraglutide on serum cardiac biomarkers (CK-MB (ng/mL)) in diabetic rats.

|              | Non-diabetic control | Diabetic control | Liraglutide-treated non-diabetic rats | Liraglutide-treated diabetic rats |
|--------------|----------------------|------------------|---------------------------------------|-----------------------------------|
| Repeat no. 1 | 6.33618197145725     | 29.9750147111247 | 13.1597625561035                      | 5.91841173158095                  |
| Repeat no. 2 | 3.23771935904134     | 19.6700154608426 | 6.23173941148818                      | 17.1982082082411                  |
| Repeat no. 3 | 3.72511797223036     | 33.7001326833551 | 13.7167895426053                      | 11.2797964766602                  |
| Repeat no. 4 | 8.35540479752605     | 28.2343053783068 | 4.2821449587321                       | 3.02883423910319                  |
| Repeat no. 5 | 6.5450670913954      | 19.809272207468  | 13.4382760493544                      | 3.44660447897949                  |
| Repeat no. 6 | 12.0457085831001     | 14.0301172225125 | 28.0254202583686                      | 8.98206015734051                  |

**Table S1 (F).** Original data for the effects of liraglutide on cardiac oxidative stress markers (MDA (mmol/g)) in diabetic rats.

|              | Non-diabetic control | Diabetic control | Liraglutide-treated non-diabetic rats | Liraglutide-treated diabetic rats |
|--------------|----------------------|------------------|---------------------------------------|-----------------------------------|
| Repeat no. 1 | 39.5                 | 92.75            | 10.25                                 | 26.25                             |
| Repeat no. 2 | 13                   | 18.5             | 9                                     | 26.75                             |
| Repeat no. 3 | 27                   | 79.25            | 14.5                                  | 56                                |
| Repeat no. 4 | 32.5                 | 44.5             | 13.5                                  | 46.75                             |
| Repeat no. 5 | 16.25                | 68.75            | 11.75                                 | 16.5                              |
| Repeat no. 6 | 39.75                | 72.5             | 9.25                                  | 21.25                             |

**Table S1 (G).** Original data for the effects of liraglutide on cardiac oxidative stress markers (SOD (U/ml)) in diabetic rats.

|              | Non-diabetic control | Diabetic control | Liraglutide-treated non-diabetic rats | Liraglutide-treated diabetic rats |
|--------------|----------------------|------------------|---------------------------------------|-----------------------------------|
| Repeat no. 1 | 1.559                | 0.873            | 1.281                                 | 1.377                             |
| Repeat no. 2 | 1.805                | 1.31             | 1.555                                 | 1.488                             |
| Repeat no. 3 | 1.255                | 0.224            | 1.545                                 | 1.594                             |
| Repeat no. 4 | 0.982                | 0.124            | 1.338                                 | 1.794                             |
| Repeat no. 5 | 1.838                | 0.876            | 1.642                                 | 2.052                             |
| Repeat no. 6 | 1.559                | 0.873            | 1.281                                 | 1.377                             |

**Table S1 (H).** Original data for the effects of liraglutide on of on cardiac oxidative stress markers (GPX (nmol/min/mg protein)) in diabetic rats.

|              | Non-diabetic control | Diabetic control | Liraglutide-treated non-diabetic rats | Liraglutide-treated diabetic rats |
|--------------|----------------------|------------------|---------------------------------------|-----------------------------------|
| Repeat no. 1 | 165.09021088337      | 84.7988104921902 | 121.775654580474                      | 86.5345213188017                  |
| Repeat no. 2 | 108.589490959585     | 99.9835187932504 | 139.272740716469                      | 115.119545432771                  |
| Repeat no. 3 | 150.624388603053     | 66.3518509213321 | 104.751313372528                      | 118.03064939311                   |
| Repeat no. 4 | 171.288354016107     | 85.8877571097292 | 91.1317035122362                      | 122.045021647597                  |
| Repeat no. 5 | 157.702719164588     | 57.0476027172991 | 102.844376658592                      | 85.4538398984304                  |

|              |                  |                 |                  |                  |
|--------------|------------------|-----------------|------------------|------------------|
| Repeat no. 6 | 123.900853501179 | 55.551943776153 | 102.139010126065 | 125.833234299624 |
|--------------|------------------|-----------------|------------------|------------------|

**Table S1 (I).** Original data for the effects of liraglutide on diabetic cardiac tissue apoptosis showing the numbers of Tunel-postive cells in all experimental groups versus controls.

|              | Non-diabetic control | Diabetic control | Liraglutide-treated non-diabetic rats | Liraglutide-treated diabetic rats |
|--------------|----------------------|------------------|---------------------------------------|-----------------------------------|
| Repeat no. 1 | 11.05544             | 40.989982        | 15.591222                             | 20.60839                          |
| Repeat no. 2 | 11.0222              | 44               | 15.00054499                           | 25.7658                           |
| Repeat no. 3 | 13.870011            | 43.55            | 13.998882                             | 26.188                            |
| Repeat no. 4 | 11.8749899           | 45.88442         | 14.000984                             | 24.0089883                        |
| Repeat no. 5 | 12.08888997          | 43.98            | 15.80566                              | 23.301                            |
| Repeat no. 6 | 12.099989911         | 48.000022        | 12.000022                             | 27.755                            |

**Table S1 (J).** Original data for the effects of liraglutide on diabetic cardiac tissue apoptosis showing the percentage (%) of Tunel-positive cells in all experimental groups versus controls.

|              | Non-diabetic control | Diabetic control | Liraglutide-treated non-diabetic rats | Liraglutide-treated diabetic rats |
|--------------|----------------------|------------------|---------------------------------------|-----------------------------------|
| Repeat no. 1 | 1.05964000           | 4.9450079        | 1.1                                   | 2.84999                           |
| Repeat no. 2 | 1.05940000           | 4.799001         | 1.21                                  | 2.8599519253                      |
| Repeat no. 3 | 1.02500000           | 3.9004684        | 1.1001                                | 2.72299931395                     |
| Repeat no. 4 | 1.00001450           | 4.950034         | 1                                     | 2.7699999                         |
| Repeat no. 5 | 1.00000022           | 4.950009         | 1.000067                              | 2.9999999                         |
| Repeat no. 6 | 0.999601097          | 3.900900976      | 1                                     | 3.0000995999654                   |

**Table S1 (K).** Original data for the effects of liraglutide on the expression levels of phosphorelated-phosphatidylinositol 3-kinase (P-PI3K) proteins.

|              | Non-diabetic control | Diabetic control | Liraglutide-treated non-diabetic rats | Liraglutide-treated diabetic rats |
|--------------|----------------------|------------------|---------------------------------------|-----------------------------------|
| Repeat no. 1 | 1.049640000          | 0.20945779       | 0.606186431                           | 0.82628538                        |
| Repeat no. 2 | 1.069400000          | 0.293881038      | 0.628876416                           | 0.844614653                       |
| Repeat no. 3 | 1.025000000          | 0.302004684      | 0.867074738                           | 0.807728952                       |
| Repeat no. 4 | 1.000000145          | 0.287503425      | 0.839822067                           | 1.000000209                       |
| Repeat no. 5 | 0.999999822          | 0.454592778      | 1.092224111                           | 0.997194908                       |
| Repeat no. 6 | 0.999601097          | 0.537659331      | 1.093051149                           | 0.539123917                       |

**Table S1 (L).** Original data for the effects of liraglutide on the expression of phosphorelated protein kinase B (P-Akt) proteins.

|              | Non-diabetic control | Diabetic control | Liraglutide-treated non-diabetic rats | Liraglutide-treated diabetic rats |
|--------------|----------------------|------------------|---------------------------------------|-----------------------------------|
| Repeat no. 1 | 1.011000000          | 0.3464111        | 1.422543956                           | 0.802618195                       |
| Repeat no. 2 | 1.210000000          | 0.37369954       | 1.670004676                           | 0.887804902                       |
| Repeat no. 3 | 1.000006051          | 0.307830604      | 1.363888205                           | 0.826896066                       |
| Repeat no. 4 | 1.011829000          | 0.347204972      | 1.451069376                           | 0.843913358                       |
| Repeat no. 5 | 1.000605100          | 0.247226508      | 1.085596857                           | 0.862879073                       |

|              |             |             |             |             |
|--------------|-------------|-------------|-------------|-------------|
| Repeat no. 6 | 1.000199400 | 0.265455338 | 0.948917349 | 0.659089985 |
|--------------|-------------|-------------|-------------|-------------|

**Table S1 (M).** Original data for the effects of liraglutide on the expression levels of Integrin-linked kinase (ILK) proteins.

|              | Non-diabetic control | Diabetic control | Liraglutide-treated non-diabetic rats | Liraglutide-treated diabetic rats |
|--------------|----------------------|------------------|---------------------------------------|-----------------------------------|
| Repeat no. 1 | 0.999968929          | 0.241855502      | 0.759337141                           | 1.042872387                       |
| Repeat no. 2 | 1.011948383          | 0.298206916      | 0.903088089                           | 1.217802761                       |
| Repeat no. 3 | 0.999937231          | 0.494280763      | 0.935759676                           | 0.2181051415                      |
| Repeat no. 4 | 1.000000000          | 0.333538245      | 0.3917361904                          | 0.440528673                       |
| Repeat no. 5 | 1.000000000          | 0.118171806      | 0.578689427                           | 0.669713656                       |
| Repeat no. 6 | 1.048871078          | 0.066070264      | 0.503121797                           | 0.566675985                       |

**Table S1 (N).** Original data for the effects of liraglutide on the expression levels of phosphorelated phosphatase and Tensin homolog (P-PTEN) proteins.

|              | Non-diabetic control | Diabetic control | Liraglutide-treated non-diabetic rats | Liraglutide-treated diabetic rats |
|--------------|----------------------|------------------|---------------------------------------|-----------------------------------|
| Repeat no. 1 | 1.11000              | 4.544248009      | 1.093053538                           | 0.920418691                       |
| Repeat no. 2 | 1.21000              | 6.738760382      | 1.074260416                           | 2.115519253                       |
| Repeat no. 3 | 1.10013              | 2.575971634      | 1.145126711                           | 0.949617943                       |
| Repeat no. 4 | 1.00000              | 6.35362074       | 1.285996055                           | 4.757678219                       |
| Repeat no. 5 | 1.000067             | 2.912621626      | 0.37710956                            | 0.927931395                       |
| Repeat no. 6 | 1.000000             | 2.237714258      | 0.487987005                           | 0.790578709                       |
